# Supplementary material
Source: publisher figshare collection journal article supplement (https://sage.figshare.com/ndownloader/files/12957344)
Supplement: Supplementary file 1 [file 12957344]

**Supplemental Appendix 4.** Food & Fitness Change Efforts and Partners Critical to these Efforts.

| F&F Community Food Efforts                                                                                                                                                                                                                                                                                                                                                                                                                                                                                                                                                                                                                                                                                                                                                                                                                                                                                                                                                     | Partners critical to these efforts                                                                                                                                                                                                                                                                                                                                                                                                                                                                                                                                                                                                                                                                                                                                                                                                                                                                                                                                                                                                                                                                  |
|--------------------------------------------------------------------------------------------------------------------------------------------------------------------------------------------------------------------------------------------------------------------------------------------------------------------------------------------------------------------------------------------------------------------------------------------------------------------------------------------------------------------------------------------------------------------------------------------------------------------------------------------------------------------------------------------------------------------------------------------------------------------------------------------------------------------------------------------------------------------------------------------------------------------------------------------------------------------------------|-----------------------------------------------------------------------------------------------------------------------------------------------------------------------------------------------------------------------------------------------------------------------------------------------------------------------------------------------------------------------------------------------------------------------------------------------------------------------------------------------------------------------------------------------------------------------------------------------------------------------------------------------------------------------------------------------------------------------------------------------------------------------------------------------------------------------------------------------------------------------------------------------------------------------------------------------------------------------------------------------------------------------------------------------------------------------------------------------------|
| <ul style="list-style-type: none"> <li>• Strengthen local and regional food systems</li> <li>• Work with community market networks to increase neighborhood-based support for alternative food outlets and community gardens.</li> <li>• Invest in new and existing local producers to increase their capacity to enter the local food system.</li> <li>• Develop and maintain storage and processing capabilities for local foods</li> <li>• Develop infrastructure for light processing such as washing, chopping, and freezing of foods</li> <li>• Transform corner stores by connecting small neighborhood stores with financing opportunities, technical assistance, and community support so they could increase the amount of fresh or prepared healthy food options they provided.</li> <li>• Pilot and expand prescription programs and incentives programs</li> <li>• Bridge the gap for families between purchasing food and increasing cooking at home.</li> </ul> | <ul style="list-style-type: none"> <li>• <b>Nonprofit community-based organizations</b> <ul style="list-style-type: none"> <li>○ farmer's markets/mobile markets</li> <li>○ food hubs</li> <li>○ community gardens,</li> <li>○ community food banks</li> <li>○ food incentive programs</li> <li>○ community development corporations</li> <li>○ planning commissions</li> <li>○ housing development corporations</li> <li>○ churches</li> </ul> </li> <li>• <b>For-profit businesses</b> <ul style="list-style-type: none"> <li>○ grocery stores/corner stores/local markets/food co-ops</li> <li>○ food supply companies</li> <li>○ farms/dairies</li> <li>○ food processing companies</li> </ul> </li> <li>• <b>Local government organizations</b> <ul style="list-style-type: none"> <li>○ county extension offices</li> <li>○ community colleges</li> <li>○ public health departments</li> </ul> </li> <li>• <b>Community residents</b> <ul style="list-style-type: none"> <li>○ neighborhood associations</li> <li>○ youth development centers</li> <li>○ entrepreneurs</li> </ul> </li> </ul> |

| F&F School Food Efforts                                                                                                                                                                                                                                                                                                                                                                                                                                                                                                                                                                                                                                         | Partners Critical to these Efforts                                                                                                                                                                                                                                                                                                                                                                                                                                                                                                                                                               |
|-----------------------------------------------------------------------------------------------------------------------------------------------------------------------------------------------------------------------------------------------------------------------------------------------------------------------------------------------------------------------------------------------------------------------------------------------------------------------------------------------------------------------------------------------------------------------------------------------------------------------------------------------------------------|--------------------------------------------------------------------------------------------------------------------------------------------------------------------------------------------------------------------------------------------------------------------------------------------------------------------------------------------------------------------------------------------------------------------------------------------------------------------------------------------------------------------------------------------------------------------------------------------------|
| <ul style="list-style-type: none"> <li>• Form school wellness teams to provide leadership and built capacity at the school and school district levels to integrate F&amp;F strategies into school operations through program planning, advocacy, education, resource mapping, fiscal planning, youth engagement, and evaluation support</li> <li>• Increase the number of schools sourcing healthy, locally grown foods</li> <li>• Establish procurement policies that allowed for geographic preferencing of local foods</li> <li>• Change infrastructures to support local food preparation, (e.g., cafeteria equipment, trainings for food staff)</li> </ul> | <ul style="list-style-type: none"> <li>• <b>School staff</b> <ul style="list-style-type: none"> <li>○ school food service &amp; nutrition directors</li> <li>○ superintendents</li> <li>○ principals</li> <li>○ teachers</li> <li>○ counselors</li> <li>○ nurses</li> </ul> </li> <li>• <b>Students</b></li> <li>• <b>For profit and nonprofit businesses</b> <ul style="list-style-type: none"> <li>○ food hubs</li> <li>○ food co-ops</li> </ul> </li> <li>• <b>Government</b> <ul style="list-style-type: none"> <li>○ FoodCorps interns</li> <li>○ Americorps interns</li> </ul> </li> </ul> |

| F&F Active Living & Built Environment Efforts                                                                                                                                                                                                                                                                                                                                                                                                                                                                                                                                                                                                                                                                                                                                                                                                                                                                                                                                                                                                                                                                                                                                                                                                                                                                                                                                                                                                                                                                                  | Partners Critical to these Efforts                                                                                                                                                                                                                                                                                                                                                                                                                                                                                                                                                                                                                                                                                                                                     |
|--------------------------------------------------------------------------------------------------------------------------------------------------------------------------------------------------------------------------------------------------------------------------------------------------------------------------------------------------------------------------------------------------------------------------------------------------------------------------------------------------------------------------------------------------------------------------------------------------------------------------------------------------------------------------------------------------------------------------------------------------------------------------------------------------------------------------------------------------------------------------------------------------------------------------------------------------------------------------------------------------------------------------------------------------------------------------------------------------------------------------------------------------------------------------------------------------------------------------------------------------------------------------------------------------------------------------------------------------------------------------------------------------------------------------------------------------------------------------------------------------------------------------------|------------------------------------------------------------------------------------------------------------------------------------------------------------------------------------------------------------------------------------------------------------------------------------------------------------------------------------------------------------------------------------------------------------------------------------------------------------------------------------------------------------------------------------------------------------------------------------------------------------------------------------------------------------------------------------------------------------------------------------------------------------------------|
| <ul style="list-style-type: none"> <li>• Create and expand transportation choices that allow residents to commute throughout their communities</li> <li>• Draft, pass, and implement complete streets ordinances</li> <li>• Create safe routes to schools; create rural models for safe routes to school</li> <li>• Purchase additional books for students to minimize the burden of heavy backpacks during the commute to school</li> <li>• Increase greenways and open space</li> <li>• Creating and support a culture of biking</li> <li>• Increase awareness of speed limits on roads with high traffic fatalities involving unawareness of students walking to school</li> <li>• Incorporate physical activity into the school day, including before and after-school programming</li> <li>• Develop and maintain parks and playing fields</li> <li>• Implement earn-a-bike programs</li> <li>• Establish joint use agreements to increase opportunities for physical activity in the community</li> <li>• Promote community gardens and markets as gathering places</li> <li>• Better utilize existing infrastructures</li> <li>• Address safety issues in parks and green spaces e.g. traffic problems, drug activity, poor lighting</li> <li>• Ensure that health is considered and addressed by city planning officials</li> <li>• Influence the city planning process to focus more at the neighborhood level and include more democratic, transparent, and accountable capital fund allocation processes</li> </ul> | <ul style="list-style-type: none"> <li>• <b>City government officials</b> <ul style="list-style-type: none"> <li>○ city councils</li> <li>○ departments of public works</li> <li>○ city planning departments</li> <li>○ mayor's office</li> <li>○ law enforcement</li> <li>○ the Department of Transportation</li> <li>○ Parks and Recreation department</li> <li>○ public health</li> </ul> </li> <li>• <b>Non- profit and for profit community based organizations</b> <ul style="list-style-type: none"> <li>○ partners from greenways coalitions</li> <li>○ biking organizations</li> <li>○ YMCA</li> <li>○ family resource centers</li> <li>○ neighborhood organizations</li> <li>○ healthcare systems</li> </ul> </li> <li>• <b>Community members</b></li> </ul> |
